# Supplementary material for: Incidence and time trends of sarcoma (2000–2013): results from the French network of cancer registries (FRANCIM)
Source: PubMed Central journal article supplement (PMC7059296; doi:10.1186/s12885-020-6683-0), 2020-03-06

### Complex genomic alterations

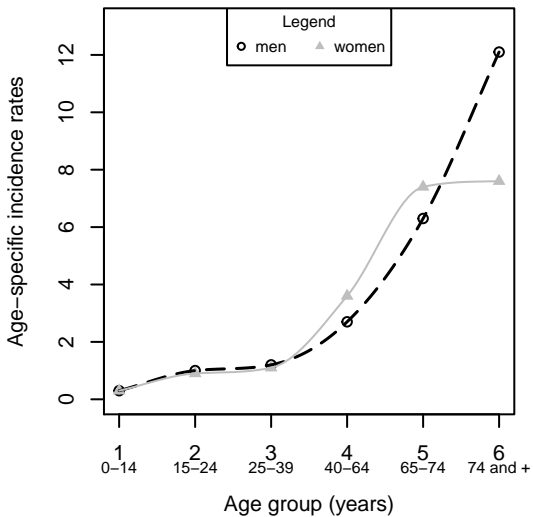

### MDM2 amplification

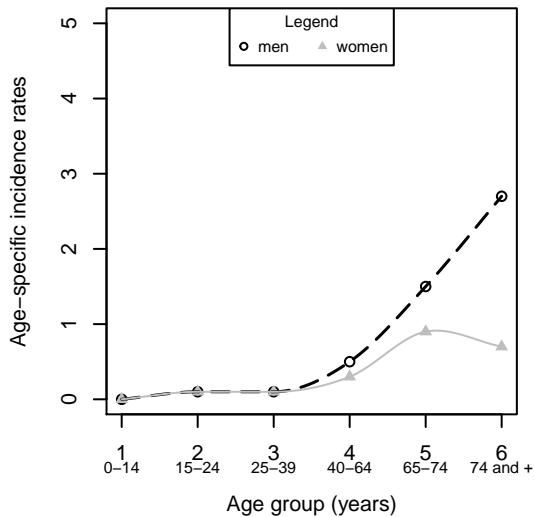

### Recurrent translocations

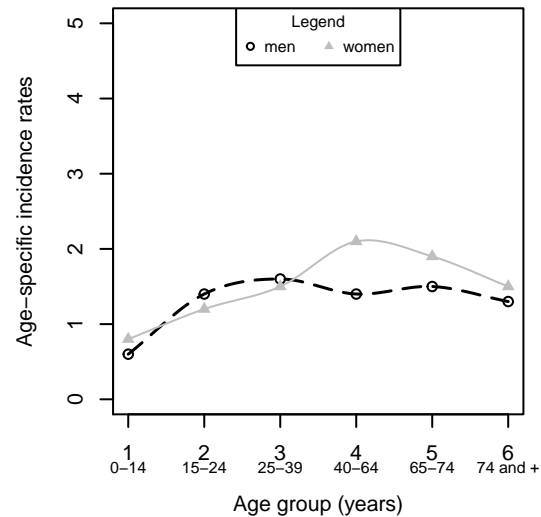

### Mutations

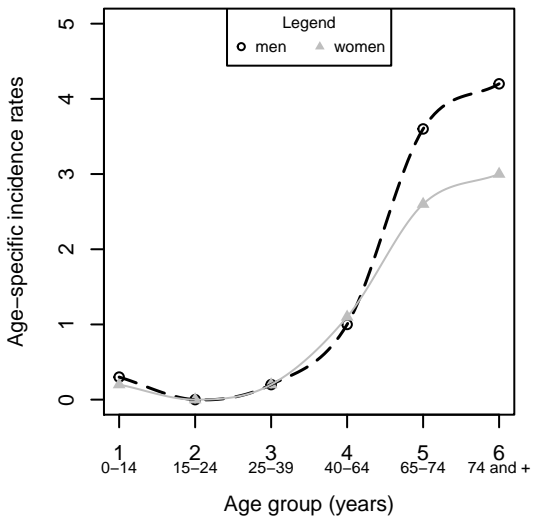

### Undefined/Miscellaneous alterations

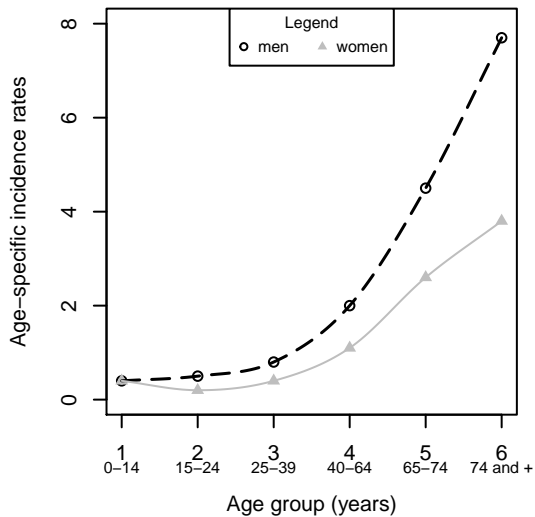

Supplement: 12885_2020_6683_MOESM3_ESM.pdf [file 12885_2020_6683_MOESM3_ESM.pdf]
