# Supplementary material for: Incidence and time trends of sarcoma (2000–2013): results from the French network of cancer registries (FRANCIM)
Source: PubMed Central journal article supplement (PMC7059296; doi:10.1186/s12885-020-6683-0), 2020-03-06

**Soft Tissue tumours (n=3766)**

APC= 0.8 | CI95%= (-0.4 ; 2.0)

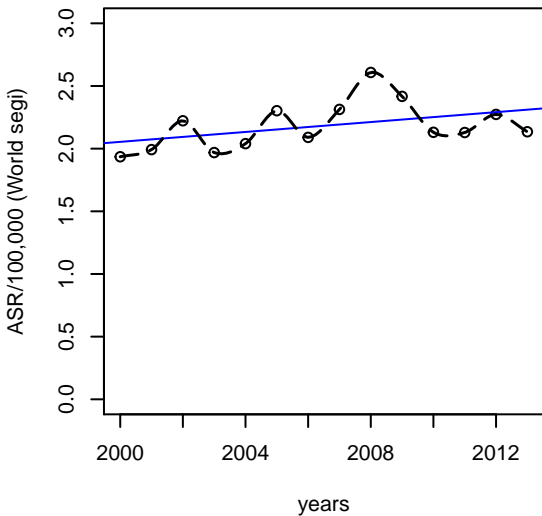**Bone tumours (n=1193)**

APC= 1.2 | CI95%= (-0.4 ; 2.9)

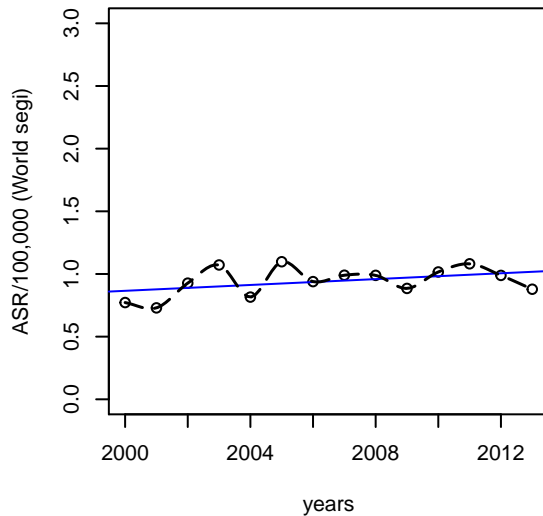**Skin tumours (n=1062)**

APC= -2.0\* | CI95%= (-3.5 ; -0.4)

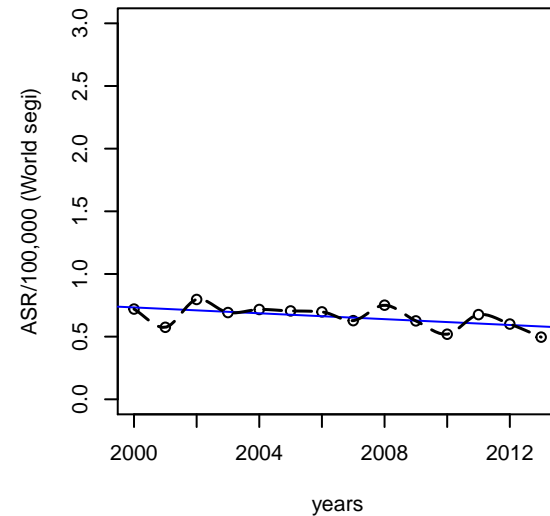**Gastro-intestinal tumours (n=1053)**

APC= 1.5 | CI95%= (-0.3 ; 3.3)

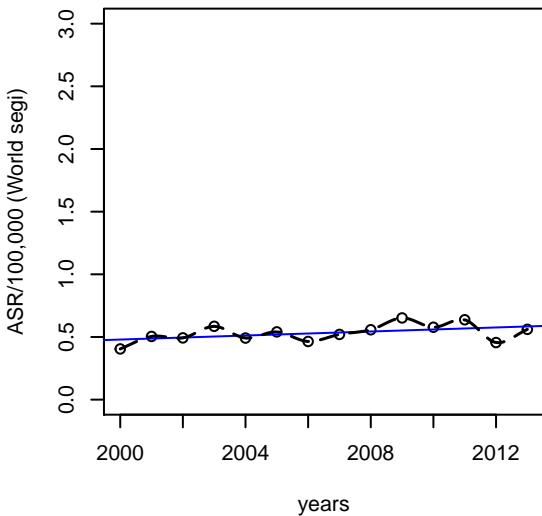**Woman genital tumours (n=673)**

APC= -3,1 | CI95%= (-5.3 ; 0.8)

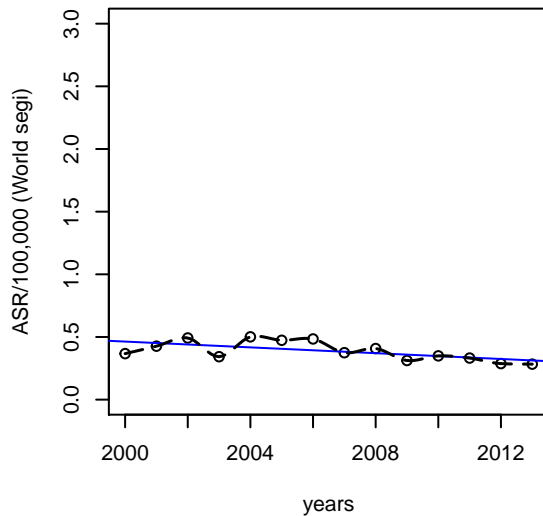**Others viscera tumours (n=540)**

APC= -1.7 | CI95%= (-5.1 ; 1.8)

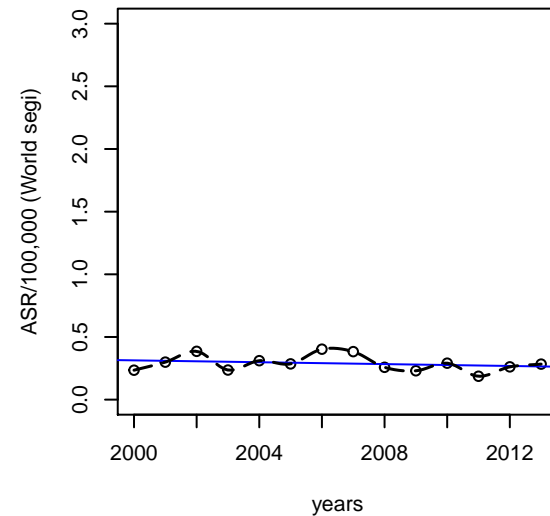

Supplement: 12885_2020_6683_MOESM4_ESM.pdf [file 12885_2020_6683_MOESM4_ESM.pdf]
