# Supplementary material for: Incidence and time trends of sarcoma (2000–2013): results from the French network of cancer registries (FRANCIM)
Source: PubMed Central journal article supplement (PMC7059296; doi:10.1186/s12885-020-6683-0), 2020-03-06

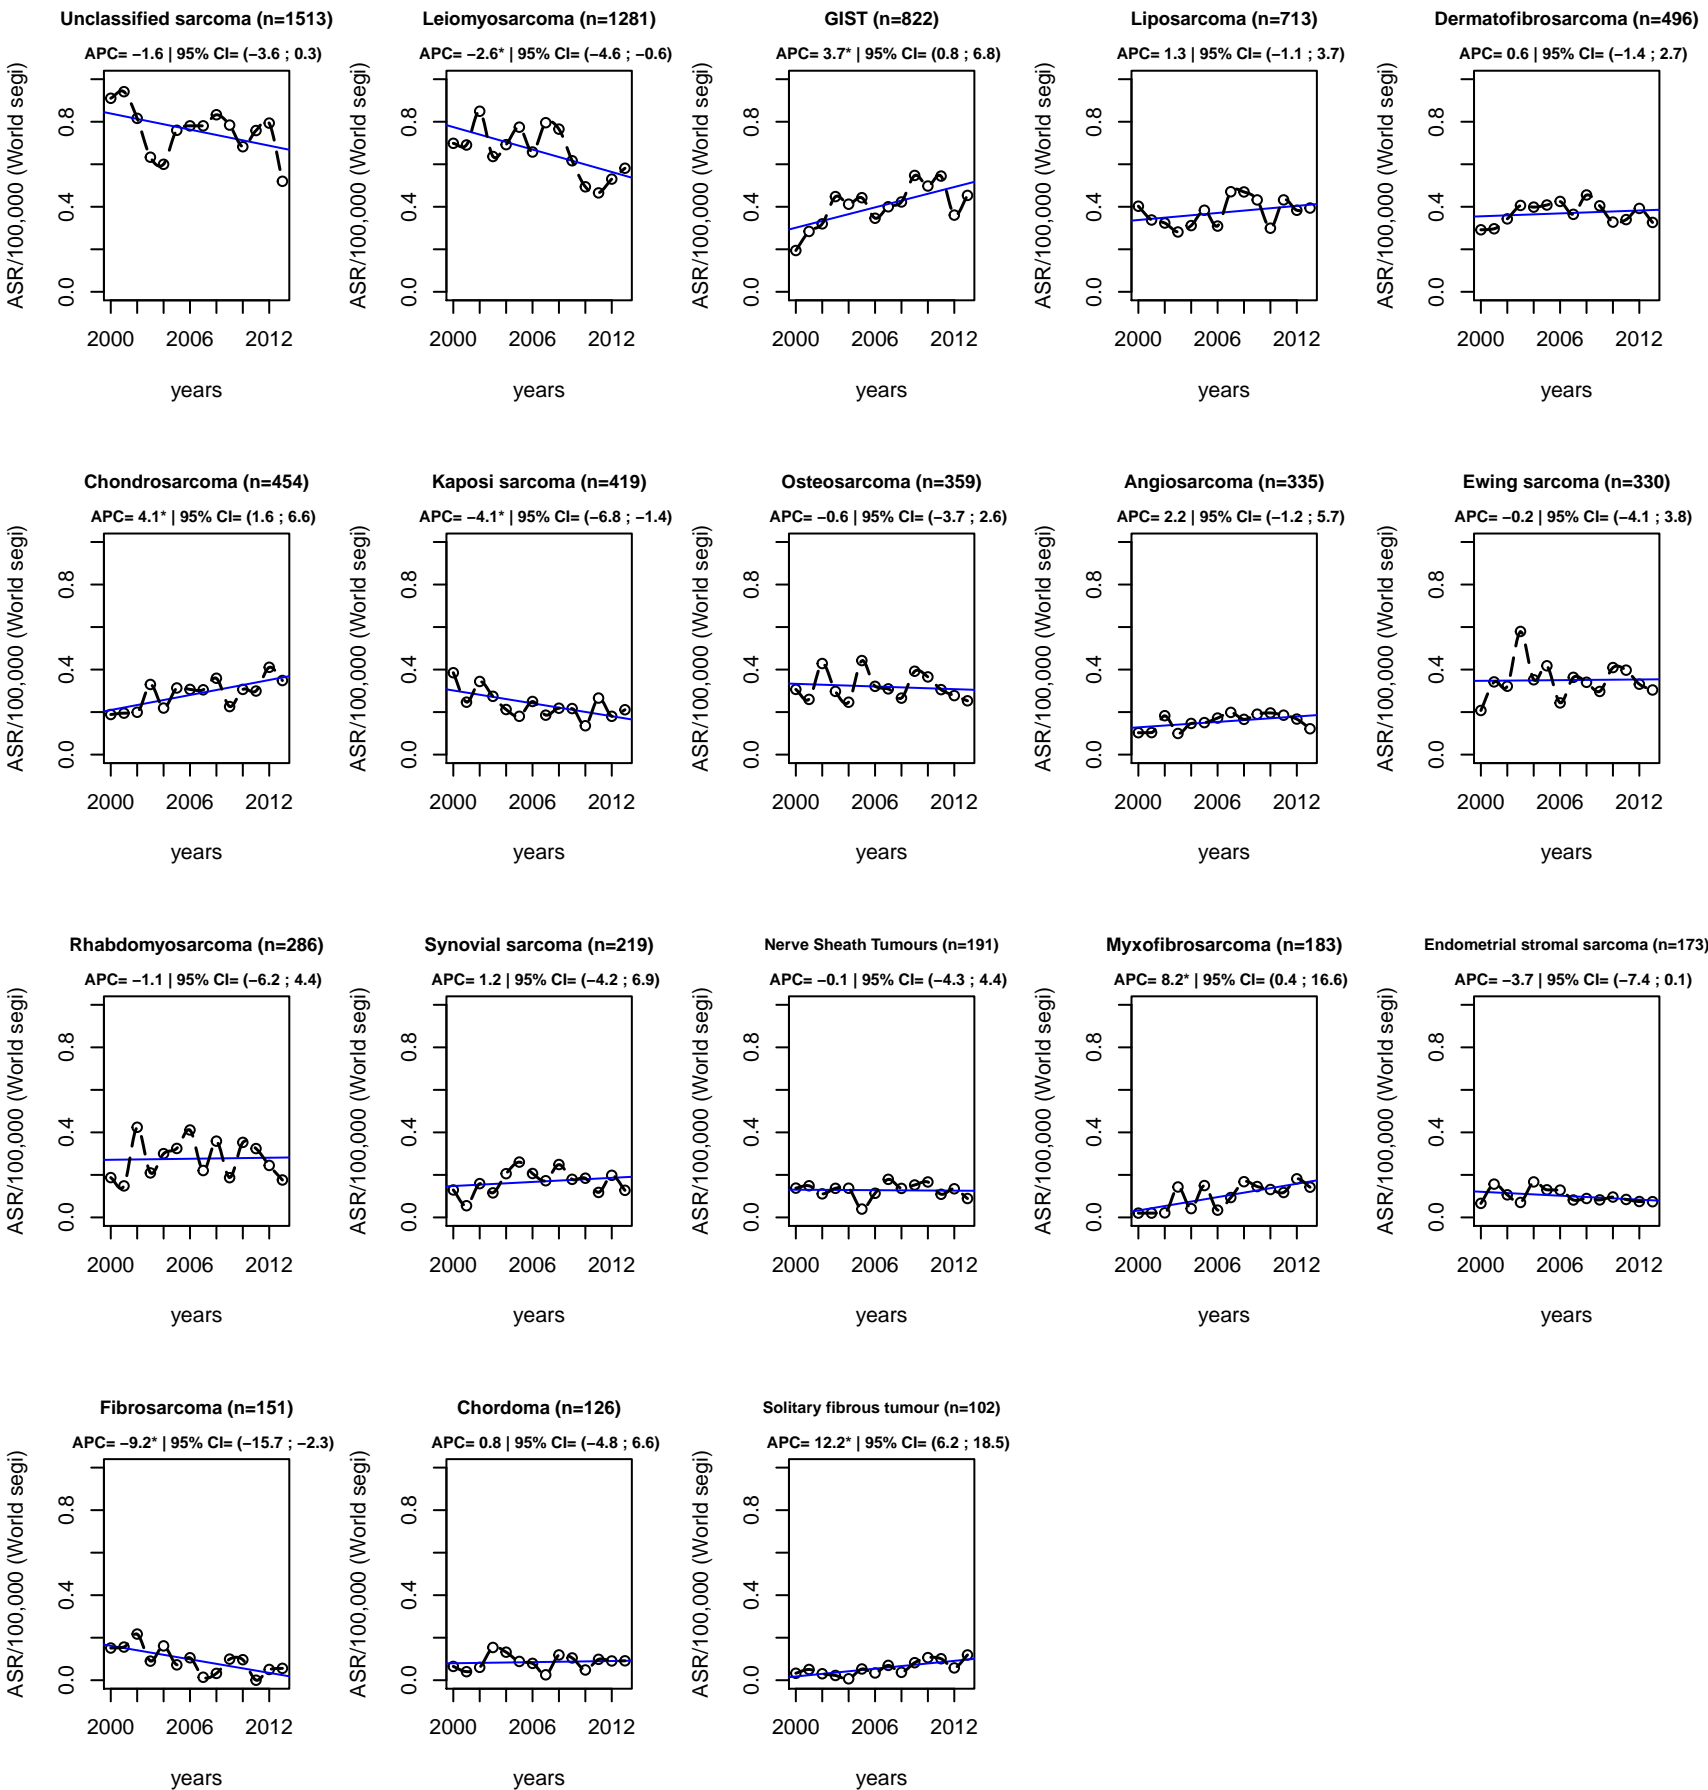

Supplement: 12885_2020_6683_MOESM5_ESM.pdf [file 12885_2020_6683_MOESM5_ESM.pdf]
